# Supplementary material for: Functional Evolution of Subolesin/Akirin
Source: Front Physiol. 2018 Nov 13;9:1612. doi: 10.3389/fphys.2018.01612 (PMC6277881; doi:10.3389/fphys.2018.01612)
Supplement: DATASET S1 — Annotation of the Subolesin/Akirin interactome. The information on Subolesin/Akirin-protein interactions was compiled from the literature and String protein-protein interactions database v.10.5 (https://string-db.org). Only predictions with medium (or better) confidence (0.4) limited to the top 10 interactions with protein-protein interaction (PPI) enrichment p-value ≤ 0.5 were considered. To compare the different species, protein annotations were standardize by identity to I. scapularis/I. ricinus-D. melanogaster-H. sapiens order of priority. [file Data_Sheet_1.xlsx]

## Sheet: Hoja1
Supplementary Dataset 1. Annotation of the Subolesin/Akirin interactome.
	Original dataset			Reference dataset
Interactome	ID	Protein	Species	ID	Protein	Species
1	Q4VRW2, S4U9E5, S4UF09	Protective antigen 4D8/Subolesin	Ixodes scapularis	S4U9E5	Subolesin	Ixodes scapularis
	Q692U9	Cement protein	Ixodes scapularis	Q692U9	Cement protein	Ixodes scapularis
	Q4PN53	Putative secreted salivary protein	Ixodes scapularis	Q4PN53	Putative secreted salivary protein	Ixodes scapularis
	Q68HD1	Calreticulin	Ixodes scapularis	Q68HD1	Calreticulin	Ixodes scapularis
	B7Q349	Elongation factor 1-alpha (GII)	Ixodes scapularis	B7Q349	Elongation factor 1-alpha (GII)	Ixodes scapularis
	PMID: 18673577	GI	Ixodes scapularis	PMID: 18673577	GI	Ixodes scapularis
2	Q9VS59	Akirin	Drosophila melanogaster	S4U9E5	Subolesin	Ixodes scapularis
	Q9VYG2	Brahma-associated protein of 60 kDa	Drosophila melanogaster	B7PRT9	Brahma/SWI2-related protein BRG-1	Ixodes scapularis
	Q9I7K6	Protein NASP homolog	Drosophila melanogaster	Q9I7K6	Protein NASP homolog	Drosophila melanogaster
	P54367	Casein kinase I isoform alpha	Drosophila melanogaster	B7P142	Casein kinase, putative	Ixodes scapularis
	Q95RI5	Failed axon connections	Drosophila melanogaster	B7PUR9	Failed axon connections, putative	Ixodes scapularis
	P08985	Histone H2A.v	Drosophila melanogaster	B7PHT2	Histone H2A	Ixodes scapularis
	P25439	ATP-dependent helicase brm	Drosophila melanogaster	B7P0R8	Helicase, putative	Ixodes scapularis
	Q9V895	Acidic leucine-rich nuclear phosphoprotein 32 family member A	Drosophila melanogaster	B7P557	Mapmodulin, putative	Ixodes scapularis
	Q94527	Nuclear factor NF-kappa-B p110 subunit	Drosophila melanogaster	B7PL56	Nuclear factor nf-kappa-B P105 subunit, putative	Ixodes scapularis
	Q9VZ23	GTP-binding nuclear protein Ran	Drosophila melanogaster	B7QIB6	GTP-binding nuclear protein	Ixodes scapularis
	Q9VRL1	GEO06356p1	Drosophila melanogaster	B7PP20	Ubiquitin-conjugating enzyme, putative	Ixodes scapularis
3	Q53H80	Akirin2	Homo sapiens	S4U9E5	Subolesin	Ixodes scapularis
	P05231	Interleukin-6	Homo sapiens	P05231	Interleukin-6	Homo sapiens
	Q15672	Twist-related protein 1	Homo sapiens	P10627	Protein twist	Drosophila melanogaster
4	Q9H9L7	Akirin1	Homo sapiens	Q9H9L7	Akirin1	Homo sapiens
	P15172	Myoblast determination protein 1	Homo sapiens	B7PYE2	Myogenic factor 6, putative	Ixodes scapularis
	Q5T160	Probable arginine--tRNA ligase, mitochondrial	Homo sapiens	B7P8Y4	Arginyl-tRNA synthetase, putative	Ixodes scapularis
5	Q99LF1	Akirin-1	Mus musculus	Q9H9L7	Akirin1	Homo sapiens
	P10085	Myoblast determination protein 1	Mus musculus	B7PYE2	Myogenic factor 6, putative	Ixodes scapularis
	Q3U186	Probable arginine--tRNA ligase, mitochondrial	Mus musculus	B7P8Y4	Arginyl-tRNA synthetase, putative	Ixodes scapularis
6	B1AXD8	Akirin-2	Mus musculus	S4U9E5	Subolesin	Ixodes scapularis
	Q61466	SWI/SNF-related matrix-associated actin-dependent regulator of chromatin subfamily D member 1	Mus musculus	B7PRT9	Brahma/SWI2-related protein BRG-1	Ixodes scapularis
	Q99JR8	SWI/SNF-related matrix-associated actin-dependent regulator of chromatin subfamily D member 2	Mus musculus	B7PRT9	Brahma/SWI2-related protein BRG-1	Ixodes scapularis
	Q6P9Z1	SWI/SNF-related matrix-associated actin-dependent regulator of chromatin subfamily D member 3	Mus musculus	B7PRT9	Brahma/SWI2-related protein BRG-1	Ixodes scapularis
	Q9EST8	NF-kappa-B inhibitor zeta	Mus musculus	B7PWC5	NF-kappaB inhibitor IkappaB, putative	Ixodes scapularis
7	G1LUW3	Akirin 1	Ailuropoda melanoleuca	Q9H9L7	Akirin1	Homo sapiens
	G1LCW1	Arginyl-tRNA synthetase 2, mitochondrial	Ailuropoda melanoleuca	B7P8Y4	Arginyl-tRNA synthetase, putative	Ixodes scapularis
8	A7MB53	AKIRIN1 protein	Bos taurus	Q9H9L7	Akirin1	Homo sapiens
	Q0VC09	RIB43A-like with coiled-coils protein 1	Bos taurus	Q9VTP5	CG7264, isoform A	Drosophila melanogaster
	F1MBP6	Kelch-like protein 3	Bos taurus	B7PPU9	Ring canal protein, putative	Ixodes scapularis
	F1MGE1	FERM domain containing 5	Bos taurus	B7PI23	FERM domain-containing protein, putative	Ixodes scapularis
	E1BP12	Vasohibin 2	Bos taurus	Q86V25	Vasohibin-2	Homo sapiens
	E1BE24	Cornichon family AMPA receptor auxiliary protein 3	Bos taurus	B7QAI8	Cornichon, putative	Ixodes scapularis
	Q0P5H7	Probable arginine--tRNA ligase, mitochondrial	Bos taurus	B7P8Y4	Arginyl-tRNA synthetase, putative	Ixodes scapularis
	F1MG09	Uncharacterized protein	Bos taurus	Q4PM81	60S ribosomal protein L44, putative	Ixodes scapularis
	Q1JP79	Actin-related protein 2/3 complex subunit 1A	Bos taurus	B7Q740	Uncharacterized protein	Ixodes scapularis
9	A8YXY8	Akirin-2	Bos taurus	S4U9E5	Subolesin	Ixodes scapularis
	F1MGS6	Uncharacterized protein	Bos taurus	Q8NGI4	Olfactory receptor 4D11	Homo sapiens
	E1BPQ9	Immunoglobulin superfamily member 5 isoform 2 precursor	Bos taurus	Q9NSI5	Immunoglobulin superfamily member 5	Homo sapiens
	M0QVY8	Olfactory receptor	Bos taurus	B7PJX6	GPR octopamine receptor 1	Ixodes scapularis
	Q0VC09	RIB43A-like with coiled-coils protein 1	Bos taurus	Q9VTP5	CG7264, isoform A	Drosophila melanogaster
	F1MBP6	Kelch-like protein 3	Bos taurus	B7PPU9	Ring canal protein, putative	Ixodes scapularis
	E1BKF7	RCC1 and BTB domain containing protein 1	Bos taurus	B7Q3G6	RCC1 and BTB domain-containing protein, putative	Ixodes scapularis
	F1MGE1	FERM domain containing 5	Bos taurus	B7PI23	FERM domain-containing protein, putative	Ixodes scapularis
	F1MLE7	Zinc finger protein 235	Bos taurus	B7PCA3	Zinc finger protein, putative	Ixodes scapularis
	A5PK26	Arf-GAP with coiled-coil, ANK repeat and PH domain-containing protein 1	Bos taurus	B7PJP8	Centaurin beta, putative	Ixodes scapularis
	A5D9A7	Cytochrome b ascorbate-dependent protein 3	Bos taurus	B7PLZ8	Cytochrome B561, putative	Ixodes scapularis
10	F7B8Z5	Akirin 1	Callithrix jacchus	Q9H9L7	Akirin1	Homo sapiens
	F6Z0V0	Arginyl-tRNA synthetase 2, mitochondrial	Callithrix jacchus	B7P8Y4	Arginyl-tRNA synthetase, putative	Ixodes scapularis
	F6W3Z6	Gap junction protein	Callithrix jacchus	V5HD36	Putative innexin inx2-like protein	Ixodes ricinus
	F6XYM4	Uncharacterized protein	Callithrix jacchus	O95274	Ly6/PLAUR domain-containing protein 3	Homo sapiens
	F6VSE7	Ras related GTP binding C	Callithrix jacchus	B7QCU2	Small GTPase involved in nuclear protein import, putative	Ixodes scapularis
	F6W042	Ras related GTP binding D	Callithrix jacchus	B7QCU2	Small GTPase involved in nuclear protein import, putative	Ixodes scapularis
	F6XRK7	Uncharacterized protein	Callithrix jacchus	Q96P26	Cytosolic 5'-nucleotidase 1B	Homo sapiens
	F6WRI5	5'-nucleotidase, cytosolic IA	Callithrix jacchus	B7PDU2	5' nucleotidase, ecto, putative	Ixodes scapularis
	F7DVE2	Protein BRICK1	Callithrix jacchus	Q4PMA3	Uncharacterized protein	Ixodes scapularis
	B0KWR6	Protein SFI1 homolog	Callithrix jacchus	A8K8P3	Protein SFI1 homolog	Homo sapiens
11	F7CFC8	Akirin 2	Callithrix jacchus	S4U9E5	Subolesin	Ixodes scapularis
	F6VSE7	Ras related GTP binding C	Callithrix jacchus	B7QCU2	Small GTPase involved in nuclear protein import, putative	Ixodes scapularis
	F6W042	Ras related GTP binding D	Callithrix jacchus	B7QCU2	Small GTPase involved in nuclear protein import, putative	Ixodes scapularis
12	E2QY19	Akirin 1	Canis lupus familiaris	Q9H9L7	Akirin1	Homo sapiens
	J9NRF9	LY6/PLAUR domain containing 3	Canis lupus familiaris	O95274	Ly6/PLAUR domain-containing protein 3	Homo sapiens
	J9P421	SFI1 centrin binding protein	Canis lupus familiaris	A8K8P3	Protein SFI1 homolog	Homo sapiens
	F1PCT1	BRICK1, SCAR/WAVE actin nucleating complex subunit	Canis lupus familiaris	Q4PMA3	Uncharacterized protein	Ixodes scapularis
	F1PKE9	SUMO1/sentrin specific peptidase 6	Canis lupus familiaris	B7QAM8	Sentrin/sumo-specific protease, putative	Ixodes scapularis
	F1P6L1	Autophagy-related protein 13	Canis lupus familiaris	B7PJK6	Autophagy-related protein 13	Ixodes scapularis
	E2R9K6	Arginyl-tRNA synthetase 2, mitochondrial	Canis lupus familiaris	B7P8Y4	Arginyl-tRNA synthetase, putative	Ixodes scapularis
13	E2R9I4	Akirin 2	Canis lupus familiaris	S4U9E5	Subolesin	Ixodes scapularis
	F1PZP3	ArfGAP with coiled-coil, ankyrin repeat and PH domains 1	Canis lupus familiaris	B7PJP8	Centaurin beta, putative	Ixodes scapularis
	F1PGP9	Cadherin like and PC-esterase domain containing 1	Canis lupus familiaris	B7PB93	Uncharacterized protein	Ixodes scapularis
	J9P7P1	Olfactory receptor	Canis lupus familiaris	B7PJX6	GPR octopamine receptor 1	Ixodes scapularis
	L7N0M8	Olfactory receptor	Canis lupus familiaris	B7PJX6	GPR octopamine receptor 1	Ixodes scapularis
	E2RL34	60S ribosomal protein L18a	Canis lupus familiaris	Q4PM66	60S ribosomal protein L18a	Ixodes scapularis
	J9NYP7	SH3 and cysteine rich domain 3	Canis lupus familiaris	V5IJ12	Putative sh3 and cysteine rich protein	Ixodes ricinus
	F1PIR0	Cornichon family AMPA receptor auxiliary protein 4	Canis lupus familiaris	B7QAI8	Cornichon, putative	Ixodes scapularis
	J9NVM6	60S ribosomal protein L18a	Canis lupus familiaris	Q4PM66	60S ribosomal protein L18a	Ixodes scapularis
	E2R3G8	Transcription initiation factor IIA subunit 2	Canis lupus familiaris	B7Q1Q9	Transcription initiation factor IIA subunit 2	Ixodes scapularis
	E2RMX1	Transmembrane protein 263	Canis lupus familiaris	Q8WUH6	Transmembrane protein 263	Homo sapiens
14	A0A286XJF8	Akirin 1	Cavia porcellus	Q9H9L7	Akirin1	Homo sapiens
	H0W382	Arginyl-tRNA synthetase 2, mitochondrial	Cavia porcellus	B7P8Y4	Arginyl-tRNA synthetase, putative	Ixodes scapularis
15	B0BLV7	Akirin 1	Danio rerio	Q9H9L7	Akirin1	Homo sapiens
	Q6DEG4	Ragulator complex protein LAMTOR2	Danio rerio	B7Q5U4	MP1 adaptor interacting protein P14, putative	Ixodes scapularis
	B3DJ73	5'-nucleotidase, cytosolic IAa	Danio rerio	B7PDU2	5' nucleotidase, ecto, putative	Ixodes scapularis
	F1QIB5	Ras-related GTP-binding D	Danio rerio	B7QCU2	Small GTPase involved in nuclear protein import, putative	Ixodes scapularis
	Q5TZ16	Gamma-aminobutyric acid (GABA) A receptor, rho 1	Danio rerio	B7Q4M3	Gaba-gated chloride channel, putative	Ixodes scapularis
	A5WVY0	Arginyl-tRNA synthetase 2, mitochondrial (putative)	Danio rerio	B7P8Y4	Arginyl-tRNA synthetase, putative	Ixodes scapularis
	F8W419	Erythrocyte membrane protein band 4.1-like 4B	Danio rerio	B7Q520	Protein 4.1G, putative	Ixodes scapularis
	Q8JGS0	U1 small nuclear ribonucleoprotein C	Danio rerio	B7Q2M2	U1 small nuclear ribonucleoprotein C	Ixodes scapularis
	Q5RGT1	Vasohibin 2	Danio rerio	Q86V25	Vasohibin-2	Homo sapiens
	E7F1C5	FERM domain-containing 5	Danio rerio	B7PI23	FERM domain-containing protein, putative	Ixodes scapularis
	A8WH86	Interleukin 13 receptor alpha 1	Danio rerio	P78552	Interleukin-13 receptor subunit alpha-1	Homo sapiens
16	A5WVY2	Akirin 2	Danio rerio	S4U9E5	Subolesin	Ixodes scapularis
	B3DJ73	5'-nucleotidase, cytosolic IAa	Danio rerio	B7PDU2	5' nucleotidase, ecto, putative	Ixodes scapularis
	F1QIB5	Ras-related GTP-binding D	Danio rerio	B7QCU2	Small GTPase involved in nuclear protein import, putative	Ixodes scapularis
	Q5TZ16	Gamma-aminobutyric acid (GABA) A receptor, rho 1	Danio rerio	B7Q4M3	Gaba-gated chloride channel, putative	Ixodes scapularis
	A2AWA1	DEAD (Asp-Glu-Ala-Asp) box polypeptide 39Aa	Danio rerio	B7QER9	DEAD box ATP-dependent RNA helicase, putative	Ixodes scapularis
	B8A4R1	Regulator of chromosome condensation (RCC1) and BTB (POZ) domain-containing protein 1	Danio rerio	B7Q3G6	RCC1 and BTB domain-containing protein, putative	Ixodes scapularis
	Q08BZ4	Putative malate dehydrogenase 1B	Danio rerio	B7PRH2	Malate dehydrogenase	Ixodes scapularis
	F1Q5L3	Splicing factor SWAP	Danio rerio	B7P340	Splicing factor, arginine/serine-rich, putative	Ixodes scapularis
	F1QQH3	Acetyl-coenzyme A synthetase	Danio rerio	B7P9N8	Acetyl-coenzyme A synthetase, cytoplasmic, putative	Ixodes scapularis
	Q803G3	Serine/threonine-protein phosphatase	Danio rerio	B7QGY5	Serine/threonine-protein phosphatase	Ixodes scapularis
	A5WVY0	Arginyl-tRNA synthetase 2, mitochondrial (putative)	Danio rerio	B7P8Y4	Arginyl-tRNA synthetase, putative	Ixodes scapularis
17	M3X027	Akirin 1	Felis catus	Q9H9L7	Akirin1	Homo sapiens
	M3XDJ3	Arginyl-tRNA synthetase 2, mitochondrial	Felis catus	B7P8Y4	Arginyl-tRNA synthetase, putative	Ixodes scapularis
18	G3PKC7	Akirin 1	Gasterosteus aculeatus	Q9H9L7	Akirin1	Homo sapiens
	G3NZW7	Arginyl-tRNA synthetase 2, mitochondrial (putative)	Gasterosteus aculeatus	B7P8Y4	Arginyl-tRNA synthetase, putative	Ixodes scapularis
19	G3QTA9	Akirin 1	Gorilla gorilla gorilla	Q9H9L7	Akirin1	Homo sapiens
	G3RMJ3	Arginyl-tRNA synthetase 2, mitochondrial		B7P8Y4	Arginyl-tRNA synthetase, putative	Ixodes scapularis
20	I3N9W0	Akirin 1	Ictidomys tridecemlineatus	Q9H9L7	Akirin1	Homo sapiens
	I3M4B2	Arginyl-tRNA synthetase 2, mitochondrial	Ictidomys tridecemlineatus	B7P8Y4	Arginyl-tRNA synthetase, putative	Ixodes scapularis
21	F6Y5Z1	Akirin 1	Monodelphis domestica	Q9H9L7	Akirin1	Homo sapiens
	F6PVI2	Arginyl-tRNA synthetase 2, mitochondrial	Monodelphis domestica	B7P8Y4	Arginyl-tRNA synthetase, putative	Ixodes scapularis
22	M3YSM3	Akirin 1	Mustela putorius furo	Q9H9L7	Akirin1	Homo sapiens
	M3YDH1	Arginyl-tRNA synthetase 2, mitochondrial	Mustela putorius furo	B7P8Y4	Arginyl-tRNA synthetase, putative	Ixodes scapularis
23	F6WAH8	Uncharacterized protein	Ornithorhynchus anatinus	Q9H9L7	Akirin1	Homo sapiens
	F7G9W7	Arginyl-tRNA synthetase 2, mitochondrial	Ornithorhynchus anatinus	B7P8Y4	Arginyl-tRNA synthetase, putative	Ixodes scapularis
24	H2MIN3	Akirin 1	Oryzias latipes	Q9H9L7	Akirin1	Homo sapiens
	H2M771	Arginyl-tRNA synthetase 2, mitochondrial (putative)	Oryzias latipes	B7P8Y4	Arginyl-tRNA synthetase, putative	Ixodes scapularis
25	H0WXF0	Akirin 1	Otolemur garnettii	Q9H9L7	Akirin1	Homo sapiens
	H0XGX9	Arginyl-tRNA synthetase 2, mitochondrial	Otolemur garnettii	B7P8Y4	Arginyl-tRNA synthetase, putative	Ixodes scapularis
	H0X086	LY6/PLAUR domain containing 3	Otolemur garnettii	O95274	Ly6/PLAUR domain-containing protein 3	Homo sapiens
	H0XBF4	Ras related GTP binding C	Otolemur garnettii	B7QCU2	Small GTPase involved in nuclear protein import, putative	Ixodes scapularis
	H0WUS9	Ras related GTP binding D	Otolemur garnettii	B7QCU2	Small GTPase involved in nuclear protein import, putative	Ixodes scapularis
	H0WN49	5'-nucleotidase, cytosolic IA	Otolemur garnettii	B7PDU2	5' nucleotidase, ecto, putative	Ixodes scapularis
	H0WJ84	Uncharacterized protein	Otolemur garnettii	Q96P26	Cytosolic 5'-nucleotidase 1B	Homo sapiens
	H0WGZ1	BRICK1, SCAR/WAVE actin nucleating complex subunit	Otolemur garnettii	Q4PMA3	Uncharacterized protein	Ixodes scapularis
	H0WWK2	SFI1 centrin binding protein	Otolemur garnettii	A8K8P3	Protein SFI1 homolog	Homo sapiens
26	H0XEX1	Akirin 2	Otolemur garnettii	S4U9E5	Subolesin	Ixodes scapularis
	H0XBF4	Ras related GTP binding C	Otolemur garnettii	B7QCU2	Small GTPase involved in nuclear protein import, putative	Ixodes scapularis
	H0WUS9	Ras related GTP binding D	Otolemur garnettii	B7QCU2	Small GTPase involved in nuclear protein import, putative	Ixodes scapularis
27	H2N7W5	Akirin 1	Pongo abelii	Q9H9L7	Akirin1	Homo sapiens
	Q5REH3	Probable arginine--tRNA ligase, mitochondrial	Pongo abelii	B7P8Y4	Arginyl-tRNA synthetase, putative	Ixodes scapularis
28	D3ZTH4	Akirin 1	Rattus norvegicus	Q9H9L7	Akirin1	Homo sapiens
	F7FFR1	Arginyl-tRNA synthetase 2, mitochondrial	Rattus norvegicus	B7P8Y4	Arginyl-tRNA synthetase, putative	Ixodes scapularis
	M0RCX0	Pterin-4 alpha-carbinolamine dehydratase 2	Rattus norvegicus	B7P7V8	Pterin-4-alpha-carbinolamine dehydratase, putative	Ixodes scapularis
	F1M1G2	Mannosidase, endo-alpha-like	Rattus norvegicus	B7QNL6	alpha-1,2-Mannosidase	Ixodes scapularis
	D3ZVD3	5'-nucleotidase, cytosolic IA	Rattus norvegicus	B7PDU2	5' nucleotidase, ecto, putative	Ixodes scapularis
	Q6AYL4	RIB43A-like with coiled-coils protein 1	Rattus norvegicus	Q9VTP5	CG7264, isoform A	Drosophila melanogaster
	F1LT12	Similar to RIKEN cDNA B130052G07 (Predicted), isoform CRA_b	Rattus norvegicus	Q86V25	Vasohibin-2	Homo sapiens
29	Q25C79	Akirin-2	Rattus norvegicus	S4U9E5	Subolesin	Ixodes scapularis
	Q9ERE4	Golgi phosphoprotein 3	Rattus norvegicus	B7QIF6	Golgi protein, putative	Ixodes scapularis
	F1LMK3	Similar to RIKEN cDNA C330016H24	Rattus norvegicus	Q96C92	Serologically defined colon cancer antigen 3	Homo sapiens
	Q5XI34	Protein phosphatase 2 (Formerly 2A), regulatory subunit A (PR 65), alpha isoform, isoform CRA_a	Rattus norvegicus	B7PA24	Protein phosphatase 2A regulatory subunit A, putative	Ixodes scapularis
	Q64623	Dual specificity protein phosphatase 1	Rattus norvegicus	B7PT02	Pyst2, putative	Ixodes scapularis
	D4A263	Pleckstrin homology domain containing, family B (Evectins) member 2 (Predicted), isoform CRA_b	Rattus norvegicus	Q96CS7	Pleckstrin homology domain-containing family B member 2	Ixodes scapularis
	F7FFR1	Arginyl-tRNA synthetase 2, mitochondrial	Rattus norvegicus	B7P8Y4	Arginyl-tRNA synthetase, putative	Ixodes scapularis
	F1M1G2	Mannosidase, endo-alpha-like	Rattus norvegicus	B7QNL6	alpha-1,2-Mannosidase	Ixodes scapularis
	O35509	Ras-related protein Rab-11B	Rattus norvegicus	B7PKX9	RAS-related protein, putative	Ixodes scapularis
	D3ZLQ9	SH3 domain and tetratricopeptide repeats 1	Rattus norvegicus	Q8TE82	SH3 domain and tetratricopeptide repeat-containing protein 1	Homo sapiens
	D4A3S7	Unkempt family-like zinc finger	Rattus norvegicus	B7P3P4	Unkempt protein, putative	Ixodes scapularis
30	G3WYT1	Akirin 1	Sarcophilus harrisii	Q9H9L7	Akirin1	Homo sapiens
	G3WA78	Arginyl-tRNA synthetase 2, mitochondrial	Sarcophilus harrisii	B7P8Y4	Arginyl-tRNA synthetase, putative	Ixodes scapularis
31	H2TCU0	Akirin 1	Takifugu rubripes	Q9H9L7	Akirin1	Homo sapiens
	H2V8R4	Arginyl-tRNA synthetase 2, mitochondrial (putative)	Takifugu rubripes	B7P8Y4	Arginyl-tRNA synthetase, putative	Ixodes scapularis
	H2SKZ8	Ras-related GTP binding D	Takifugu rubripes	B7QCU2	Small GTPase involved in nuclear protein import, putative	Ixodes scapularis
	H2SYP0	Autophagy-related protein 13	Takifugu rubripes	B7PJK6	Autophagy-related protein 13	Ixodes scapularis
	H2SGG0	Connexin 28.8	Takifugu rubripes	Q6PEY0	Gap junction beta-7 protein	Homo sapiens
	H2TBW8	Heterogeneous nuclear ribonucleoprotein R	Takifugu rubripes	B7PGM6	G-3-P dehydrogenase, putative	Ixodes scapularis
	H2UQ70	Uncharacterized protein	Takifugu rubripes	A8K8P3	Protein SFI1 homolog	Homo sapiens
	H2UDT8	Chromatin modifying protein 1B	Takifugu rubripes	B7QKA5	Vacuolar assembly/sorting protein DID2, putative	Ixodes scapularis
	H2UQ27	Uncharacterized protein	Takifugu rubripes	V5HJM3	Putative sumo1/sentrin specific peptidase 6a	Ixodes ricinus
	Q5TIL2	Alpha 2,3-sialyltransferase	Takifugu rubripes	E5FGC7	ST6Gal	Ixodes scapularis
	H2T278	Homogentisate 1,2-dioxygenase	Takifugu rubripes	B7PK05	Homogentisate 1,2-dioxygenase, putative	Ixodes scapularis
32	A0A1U7U1L3	akirin-1	Tarsius syrichta	Q9H9L7	Akirin1	Homo sapiens
	A0A1U7U1E3	probable arginine--tRNA ligase, mitochondrial	Tarsius syrichta	B7P8Y4	Arginyl-tRNA synthetase, putative	Ixodes scapularis
33	Q5BL57	Akirin-1	Xenopus tropicalis	Q9H9L7	Akirin1	Homo sapiens
	F6QKN3	Arginyl-tRNA synthetase 2, mitochondrial	Xenopus tropicalis	B7P8Y4	Arginyl-tRNA synthetase, putative	Ixodes scapularis
	F6W3E8	Gap junction protein	Xenopus tropicalis	V5HD36	Putative innexin inx2-like protein	Ixodes ricinus
	F7BYF0	5'-nucleotidase, cytosolic IA	Xenopus tropicalis	B7PDU2	5' nucleotidase, ecto, putative	Ixodes scapularis
	F7EAQ0	5'-nucleotidase, cytosolic IB	Xenopus tropicalis	B7PDU2	5' nucleotidase, ecto, putative	Ixodes scapularis
	F6ZWN6	Chromosome 21 open reading frame 59	Xenopus tropicalis	Q9VZH1	UPF0769 protein CG18675	Drosophila melanogaster
	F7BK33	Heterogeneous nuclear ribonucleoprotein R	Xenopus tropicalis	B7PGM6	G-3-P dehydrogenase, putative	Ixodes scapularis
	F7APU0	Ribosomal protein S13	Xenopus tropicalis	Q4PM11	40S ribosomal protein S13	Ixodes scapularis
	P14117	60S ribosomal protein L4	Xenopus tropicalis	B7PSE0	60S ribosomal protein L4	Ixodes scapularis
	Q28D24	Ribosomal protein S29	Xenopus tropicalis	Q4PM47	40S ribosomal protein S29	Ixodes scapularis
	B1WBI4	Synaptotagmin-binding cytoplasmic RNA-interacting protein	Xenopus tropicalis	B7PGM6	G-3-P dehydrogenase, putative	Ixodes scapularis
34	M4AFL6	Akirin 1	Xiphophorus maculatus	Q9H9L7	Akirin1	Homo sapiens
	M4AR88	Arginyl-tRNA synthetase 2, mitochondrial (putative)	Xiphophorus maculatus	B7P8Y4	Arginyl-tRNA synthetase, putative	Ixodes scapularis
Included in the Figure
